# Supplementary material for: Identification of DIR1-Dependant Cellular Responses in Guard Cell Systemic Acquired Resistance
Source: Front Mol Biosci. 2021 Dec 17;8:746523. doi: 10.3389/fmolb.2021.746523 (PMC8718647; doi:10.3389/fmolb.2021.746523)
Supplement: Supplementary file 4 [file Table1.XLSX]

## Sheet: Sheet1
	Accession	Description	Zhao_2008	Bates_2012	Wang_2011	total
1	AT5G47700	60S acidic ribosomal protein family		found		found
2	AT1G53070	Legume lectin family protein				Not found
3	AT5G48480	Lactoylglutathione lyase / glyoxalase I family protein	found	found		found
4	AT2G39020	Acyl-CoA N-acyltransferases (NAT) superfamily protein		found	found	found
5	AT3G09740	syntaxin of plants 71		found		found
6	AT4G13780	methionine--tRNA ligase, putative / methionyl-tRNA synthetase, putative / MetRS, putative	found	found		found
7	AT3G53890	Ribosomal protein S21e		found		found
8	AT2G47390	Prolyl oligopeptidase family protein	found	found		found
9	AT5G19990	regulatory particle triple-A ATPase 6A	found			found
10	AT1G66240	homolog of anti-oxidant 1		found		found
11	AT4G09040	RNA-binding (RRM/RBD/RNP motifs) family protein				Not found
12	AT3G61110	ribosomal protein S27		found		found
13	AT2G37760	NAD(P)-linked oxidoreductase superfamily protein		found		found
14	AT5G63140	purple acid phosphatase 29		found		found
15	AT5G42240	serine carboxypeptidase-like 42		found		found
16	AT5G19890	Peroxidase superfamily protein		found		found
17	AT5G39950	thioredoxin 2		found		found
18	AT5G50250	chloroplast RNA-binding protein 31B	found	found		found
19	AT1G14380	IQ-domain 28		found		found
20	AT5G06860	polygalacturonase inhibiting protein 1		found		found
21	AT3G06350	dehydroquinate dehydratase, putative / shikimate dehydrogenase, putative		found		found
22	AT2G33590	NAD(P)-binding Rossmann-fold superfamily protein		found		found
23	AT4G26300	Arginyl-tRNA synthetase, class Ic		found		found
24	AT3G48460	GDSL-like Lipase/Acylhydrolase superfamily protein		found		found
25	AT4G30160	villin 4		found		found
26	AT4G14040	selenium-binding protein 2	found	found		found
27	AT5G40020	Pathogenesis-related thaumatin superfamily protein				Not found
28	AT3G19620	Glycosyl hydrolase family protein				Not found
29	AT3G55330	PsbP-like protein 1		found		found
30	AT1G35420	alpha/beta-Hydrolases superfamily protein		found		found
31	AT1G29370	Kinase-related protein of unknown function (DUF1296)				Not found
32	AT1G21670	LOCATED IN: cell wall, plant-type cell wall; EXPRESSED IN: 23 plant structures; EXPRESSED DURING: 14 growth stages; CONTAINS InterPro DOMAIN/s: WD40-like Beta Propeller (InterPro:IPR011659), Six-bladed beta-propeller, TolB-like (InterPro:IPR011042); BEST Arabidopsis thaliana protein match is: DPP6 N-terminal domain-like protein (TAIR:AT1G21680.1); Has 8461 Blast hits to 5060 proteins in 1257 spec…		found	found	found
33	AT4G11980	nudix hydrolase homolog 14		found		found
34	AT5G55160	small ubiquitin-like modifier 2		found		found
35	AT1G16080	unknown protein; LOCATED IN: apoplast, chloroplast stroma, chloroplast, chloroplast envelope; EXPRESSED IN: 23 plant structures; EXPRESSED DURING: 14 growth stages; Has 81 Blast hits to 81 proteins in 28 species: Archae - 0; Bacteria - 2; Metazoa - 0; Fungi - 0; Plants - 62; Viruses - 0; Other Eukaryotes - 17 (source: NCBI BLink).		found		found
36	AT3G25520	ribosomal protein L5		found		found
37	AT2G32520	alpha/beta-Hydrolases superfamily protein	found	found		found
38	AT1G08980	amidase 1	found	found		found
39	AT4G01130	GDSL-like Lipase/Acylhydrolase superfamily protein				Not found
40	AT4G10480	Nascent polypeptide-associated complex (NAC), alpha subunit family protein		found		found
41	AT1G67280	Glyoxalase/Bleomycin resistance protein/Dioxygenase superfamily protein		found		found
42	AT4G26970	aconitase 2	found	found		found
43	AT5G23210	serine carboxypeptidase-like 34				Not found
44	AT5G18100	copper/zinc superoxide dismutase 3	found	found		found
45	AT4G17830	Peptidase M20/M25/M40 family protein	found	found		found
46	AT5G27380	glutathione synthetase 2	found	found		found
47	AT4G38460	geranylgeranyl reductase	found	found		found
48	AT3G49220	Plant invertase/pectin methylesterase inhibitor superfamily		found		found
49	AT4G30810	serine carboxypeptidase-like 29		found		found
50	AT3G14930	Uroporphyrinogen decarboxylase		found		found
51	AT4G23170	receptor-like protein kinase-related family protein				Not found
52	AT4G33680	Pyridoxal phosphate (PLP)-dependent transferases superfamily protein	found	found		found
53	AT1G19920	Pseudouridine synthase/archaeosine transglycosylase-like family protein	found	found		found
54	AT5G51970	GroES-like zinc-binding alcohol dehydrogenase family protein		found		found
55	AT4G24620	phosphoglucose isomerase 1	found	found		found
56	AT5G48540	receptor-like protein kinase-related family protein		found		found
57	AT5G53850	haloacid dehalogenase-like hydrolase family protein	found	found		found
58	AT4G38220	Peptidase M20/M25/M40 family protein		found		found
59	ATCG00660	ribosomal protein L20				Not found
60	AT4G21580	oxidoreductase, zinc-binding dehydrogenase family protein		found		found
61	AT5G34850	purple acid phosphatase 26	found	found		found
62	AT2G02500	Nucleotide-diphospho-sugar transferases superfamily protein		found		found
63	AT5G53140	Protein phosphatase 2C family protein		found		found
64	AT5G09650	pyrophosphorylase 6		found		found
65	AT1G60420	DC1 domain-containing protein		found		found
66	AT3G07720	Galactose oxidase/kelch repeat superfamily protein		found		found
67	AT5G45650	subtilase family protein				Not found
68	AT4G25370	Double Clp-N motif protein		found		found
69	AT3G57050	cystathionine beta-lyase		found		found
70	AT1G12240	Glycosyl hydrolases family 32 protein	found	found		found
71	AT3G14990	Class I glutamine amidotransferase-like superfamily protein	found	found		found
72	AT3G61440	cysteine synthase C1	found	found		found
73	AT3G17810	pyrimidine 1	found	found		found
74	AT2G23610	methyl esterase 3		found		found
75	AT4G14710	RmlC-like cupins superfamily protein				Not found
76	AT3G23490	cyanase		found		found
77	AT3G22960	Pyruvate kinase family protein	found	found		found
78	AT3G22060	Receptor-like protein kinase-related family protein		found		found
79	AT1G09750	Eukaryotic aspartyl protease family protein		found		found
80	AT3G50360	centrin2		found		found
81	AT1G07750	RmlC-like cupins superfamily protein		found		found
82	AT1G70890	MLP-like protein 43		found		found
83	AT1G78370	glutathione S-transferase TAU 20	found			found
84	AT5G40450	unknown protein; FUNCTIONS IN: molecular_function unknown; INVOLVED IN: biological_process unknown; LOCATED IN: chloroplast, plasma membrane; EXPRESSED IN: 24 plant structures; EXPRESSED DURING: 13 growth stages; Has 30201 Blast hits to 17322 proteins in 780 species: Archae - 12; Bacteria - 1396; Metazoa - 17338; Fungi - 3422; Plants - 5037; Viruses - 0; Other Eukaryotes - 2996 (source: NCBI BLin…	found	found		found
85	AT5G42650	allene oxide synthase		found		found
86	AT3G47560	alpha/beta-Hydrolases superfamily protein		found		found
87	AT3G01120	Pyridoxal phosphate (PLP)-dependent transferases superfamily protein	found	found		found
88	AT3G25220	FK506-binding protein 15 kD-1		found		found
89	AT5G08380	alpha-galactosidase 1				Not found
90	AT2G13820	Bifunctional inhibitor/lipid-transfer protein/seed storage 2S albumin superfamily protein				Not found
91	AT3G16640	translationally controlled tumor protein	found	found		found
92	AT1G15340	methyl-CPG-binding domain 10	found	found		found
93	AT1G20340	Cupredoxin superfamily protein	found	found		found
94	AT2G36130	Cyclophilin-like peptidyl-prolyl cis-trans isomerase family protein	found	found		found
95	AT5G04140	glutamate synthase 1	found	found		found
96	AT4G09320	Nucleoside diphosphate kinase family protein	found	found		found
97	AT2G36530	Enolase	found	found		found
98	AT4G33090	aminopeptidase M1	found	found		found
99	AT5G42890	sterol carrier protein 2		found		found
100	AT5G42980	thioredoxin 3		found		found
101	AT4G31300	N-terminal nucleophile aminohydrolases (Ntn hydrolases) superfamily protein		found		found
102	AT1G74260	purine biosynthesis 4	found	found		found
103	AT4G39150	DNAJ heat shock N-terminal domain-containing protein		found		found
104	AT5G13420	Aldolase-type TIM barrel family protein	found	found		found
105	AT3G01910	sulfite oxidase	found	found		found
106	AT2G40490	Uroporphyrinogen decarboxylase	found	found		found
107	AT5G25090	early nodulin-like protein 13				Not found
108	AT2G24200	Cytosol aminopeptidase family protein	found	found		found
109	AT5G21100	Plant L-ascorbate oxidase		found		found
110	AT3G55010	phosphoribosylformylglycinamidine cyclo-ligase, chloroplast / phosphoribosyl-aminoimidazole synthetase / AIR synthase (PUR5)	found	found		found
111	AT3G02730	thioredoxin F-type 1		found		found
112	AT3G19710	branched-chain aminotransferase4		found		found
113	AT2G14170	aldehyde dehydrogenase 6B2	found	found		found
114	AT1G08110	lactoylglutathione lyase family protein / glyoxalase I family protein	found	found		found
115	AT1G74100	sulfotransferase 16		found		found
116	AT3G55440	triosephosphate isomerase	found	found		found
117	AT3G08770	lipid transfer protein 6				Not found
118	AT3G03780	methionine synthase 2	found	found		found
119	AT1G66970	SHV3-like 2		found		found
120	AT3G19450	GroES-like zinc-binding alcohol dehydrogenase family protein				Not found
121	AT4G38970	fructose-bisphosphate aldolase 2	found	found		found
122	AT2G05990	NAD(P)-binding Rossmann-fold superfamily protein	found	found		found
123	AT2G21170	triosephosphate isomerase	found	found		found
124	AT4G30310	FGGY family of carbohydrate kinase		found		found
125	AT1G09340	chloroplast RNA binding	found	found		found
126	AT3G55800	sedoheptulose-bisphosphatase	found	found		found
127	AT1G70730	Phosphoglucomutase/phosphomannomutase family protein	found	found		found
128	AT5G60600	4-hydroxy-3-methylbut-2-enyl diphosphate synthase		found		found
129	AT5G66190	ferredoxin-NADP(+)-oxidoreductase 1	found	found		found
130	AT1G19870	IQ-domain 32		found		found
131	AT5G38430	Ribulose bisphosphate carboxylase (small chain) family protein				Not found
132	AT1G53240	Lactate/malate dehydrogenase family protein		found	found	found
133	AT5G01800	saposin B domain-containing protein		found		found
134	AT1G66670	CLP protease proteolytic subunit 3		found		found
135	AT5G16470	zinc finger (C2H2 type) family protein		found		found
136	AT4G39260	cold, circadian rhythm, and RNA binding 1	found	found		found
137	AT3G63160	FUNCTIONS IN: molecular_function unknown; INVOLVED IN: biological_process unknown; LOCATED IN: chloroplast outer membrane, thylakoid, chloroplast thylakoid membrane, chloroplast, chloroplast envelope; EXPRESSED IN: 21 plant structures; EXPRESSED DURING: 13 growth stages; BEST Arabidopsis thaliana protein match is: outer envelope membrane protein 7 (TAIR:AT3G52420.1); Has 26 Blast hits to 26 prote…				Not found
138	AT2G17390	ankyrin repeat-containing 2B		found		found
139	AT2G17200	ubiquitin family protein		found		found
140	AT3G56240	copper chaperone	found	found		found
141	AT4G29160	SNF7 family protein		found		found
142	AT1G27950	glycosylphosphatidylinositol-anchored lipid protein transfer 1		found		found
143	AT5G54160	O-methyltransferase 1		found		found
144	AT4G25740	RNA binding Plectin/S10 domain-containing protein		found		found
145	AT1G05010	ethylene-forming enzyme		found		found
146	AT5G28750	Bacterial sec-independent translocation protein mttA/Hcf106		found		found
147	AT1G27530	CONTAINS InterPro DOMAIN/s: Ubiquitin-conjugating enzyme/RWD-like (InterPro:IPR016135), Ubiquitin-fold modifier-conjugating enzyme 1 (InterPro:IPR014806); Has 269 Blast hits to 269 proteins in 110 species: Archae - 0; Bacteria - 0; Metazoa - 175; Fungi - 0; Plants - 42; Viruses - 0; Other Eukaryotes - 52 (source: NCBI BLink).		found		found
148	AT1G13270	methionine aminopeptidase 1B		found		found
149	AT5G25610	BURP domain-containing protein		found	found	found
150	ATCG00650	ribosomal protein S18				Not found
151	AT2G27720	60S acidic ribosomal protein family		found		found
152	AT3G50670	U1 small nuclear ribonucleoprotein-70K	found	found		found
153	AT3G06300	P4H isoform 2		found		found
154	AT1G15130	Endosomal targeting BRO1-like domain-containing protein		found		found
155	AT5G63470	nuclear factor Y, subunit C4		found	found	found
156	AT5G19250	Glycoprotein membrane precursor GPI-anchored		found		found
157	AT3G16910	acyl-activating enzyme 7		found	found	found
Zhao, Z., Zhang, W., Stanley, B.A., and Assmann, S.M. (2008). Functional proteomics of Arabidopsis thaliana guard cells uncovers new stomatal signaling pathways. Plant Cell 20, 3210-3226. doi:10.1105/tpc.108.063263.
Bates, G.W., Rosenthal, D.M., Sun, J., Chattopadhyay, M., Peffer, E., Yang, J., et al. (2012). A comparative study of the Arabidopsis thaliana guard-cell transcriptome and its modulation by sucrose. PLoS One 7, e49641. doi:10.1371/journal.pone.0049641.
Wang, R.S., Pandey, S., Li, S., Gookin, T.E., Zhao, Z., Albert, R., et al. (2011). Common and unique elements of the ABA-regulated transcriptome of Arabidopsis guard cells. BMC Genomics 12, 216. doi:10.1186/1471-2164-12-216.

## Sheet: Zhao_2008
At1g02080
At1g02840
At1g03090
At1g03190
At1g03475
At1g04170
At1g04410
At1g04430
At1g04510
At1g06630
At1g06680
At1g07360
At1g07370
At1g07780
At1g07810
At1g07890
At1g07920
At1g08420
At1g08470
At1g08520
At1g08980
At1g09210
At1g09340
At1g09780
At1g09795
At1g10430
At1g10770
At1g10950
At1g11260
At1g11860
At1g12470
At1g13020
At1g13060
At1g13930
At1g14010
At1g14830
At1g14850
At1g15340
At1g15730
At1g15750
At1g17840
At1g18080
At1g18210
At1g18270
At1g18450
At1g18590
At1g19130
At1g19570
At1g20010
At1g20020
At1g20340
At1g20620
At1g20950
At1g20960
At1g20970
At1g21160
At1g21540
At1g21680
At1g21750
At1g22410
At1g22920
At1g23190
At1g23290
At1g24706
At1g26550
At1g26850
At1g27090
At1g27430
At1g27680
At1g28060
At1g28420
At1g29910
At1g30000
At1g30360
At1g30400
At1g30580
At1g31190
At1g31330
At1g31850
At1g32060
At1g32470
At1g33140
At1g34220
At1g35160
At1g42550
At1g42970
At1g43170
At1g43670
At1g44575
At1g45201
At1g48030
At1g48620
At1g49040
At1g49430
At1g49670
At1g49820
At1g50030
At1g50200
At1g50380
At1g51710
At1g52400
At1g52730
At1g53000
At1g53210
At1g53290
At1g53310
At1g53580
At1g54040
At1g54170
At1g54610
At1g55860
At1g56070
At1g56450
At1g57620
At1g58380
At1g59870
At1g61580
At1g61770
At1g62020
At1g62330
At1g62750
At1g63000
At1g63180
At1g63660
At1g63770
At1g63940
At1g63970
At1g64190
At1g64550
At1g64760
At1g65440
At1g65930
At1g66200
At1g67090
At1g67140
At1g67490
At1g67580
At1g68010
At1g68530
At1g68830
At1g69340
At1g69830
At1g70410
At1g70490
At1g70600
At1g70770
At1g71410
At1g71840
At1g71860
At1g72150
At1g72160
At1g72370
At1g72610
At1g72680
At1g73370
At1g73670
At1g74260
At1g74470
At1g74910
At1g74920
At1g75640
At1g75660
At1g75680
At1g76400
At1g76550
At1g76690
At1g76720
At1g76850
At1g77260
At1g77510
At1g77940
At1g78580
At1g78630
At1g78880
At1g78900
At1g79230
At1g79340
At1g79530
At1g79550
At1g79990
At1g80070
At1g80410
At1g80480
At2g01350
At2g01720
At2g02160
At2g05070
At2g05710
At2g05830
At2g05840
At2g05990
At2g06210
At2g07050
At2g13360
At2g13560
At2g14720
At2g15620
At2g16600
At2g16890
At2g17980
At2g18450
At2g18960
At2g19080
At2g19520
At2g20420
At2g20990
At2g21060
At2g21060
At2g21130
At2g21160
At2g21410
At2g21530
At2g21590
At2g21660
At2g21880
At2g22125
At2g22400
At2g22480
At2g23350
At2g23600
At2g24180
At2g24200
At2g24270
At2g24420
At2g24580
At2g24590
At2g25110
At2g25170
At2g25450
At2g25560
At2g26040
At2g26140
At2g26680
At2g26730
At2g26890
At2g27040
At2g27100
At2g28450
At2g30050
At2g30200
At2g30720
At2g30950
At2g30950
At2g30970
At2g32240
At2g32520
At2g32920
At2g33040
At2g33150
At2g33730
At2g34660
At2g35010
At2g35040
At2g35050
At2g35100
At2g35530
At2g35790
At2g35840
At2g36060
At2g36530
At2g36880
At2g38270
At2g38280
At2g38770
At2g39730
At2g39800
At2g39850
At2g40490
At2g40840
At2g41220
At2g41560
At2g41630
At2g42520
At2g42600
At2g43160
At2g43770
At2g43910
At2g43940
At2g44050
At2g44060
At2g44200
At2g44490
At2g44525
At2g44640
At2g45300
At2g45540
At2g45600
At2g45810
At2g46020
At2g46070
At2g46280
At2g46290
At2g47390
At2g47510
At3g01120
At3g01180
At3g01280
At3g01310
At3g01480
At3g01500
At3g01670
At3g01680
At3g02080
At3g02090
At3g02350
At3g03780
At3g03960
At3g04120
At3g04610
At3g04840
At3g05060
At3g05280
At3g06510
At3g06580
At3g06810
At3g06850
At3g06860
At3g06980
At3g07140
At3g07220
At3g08510
At3g08530
At3g08590
At3g08680
At3g08740
At3g09440
At3g09630
At3g09820
At3g10380
At3g10670
At3g10690
At3g10920
At3g11130
At3g11170
At3g11210
At3g11400
At3g11630
At3g12810
At3g13300
At3g13460
At3g13870
At3g14067
At3g14120
At3g14420
At3g15020
At3g15090
At3g15730
At3g15980
At3g16110
At3g16170
At3g16270
At3g16850
At3g17240
At3g17390
At3g17810
At3g17910
At3g17940
At3g18040
At3g18520
At3g18780
At3g19170
At3g19760
At3g19870
At3g20000
At3g20300
At3g21110
At3g21865
At3g22110
At3g22460
At3g22960
At3g23410
At3g23820
At3g23940
At3g24160
At3g24170
At3g24420
At3g24480
At3g26060
At3g26340
At3g26400
At3g26650
At3g27925
At3g28530
At3g28730
At3g42050
At3g43300
At3g44310
At3g44330
At3g45980
At3g46740
At3g46970
At3g47520
At3g47590
At3g47650
At3g47810
At3g48000
At3g48410
At3g48430
At3g48720
At3g48730
At3g48870
At3g48990
At3g49010
At3g49120
At3g49680
At3g50370
At3g50590
At3g52200
At3g52850
At3g52880
At3g52930
At3g52990
At3g53580
At3g54050
At3g54300
At3g54640
At3g54760
At3g55140
At3g55200
At3g55410
At3g55440
At3g55800
At3g55830
At3g57030
At3g57300
At3g57890
At3g58140
At3g58510
At3g59020
At3g60600
At3g60750
At3g60770
At3g60830
At3g61240
At3g61690
At3g62030
At3g63260
At3g63410
At3g63460
At3g63520
At4g00570
At4g00585
At4g01050
At4g01310
At4g01370
At4g01850
At4g02080
At4g02930
At4g03550
At4g04320
At4g04910
At4g05530
At4g05590
At4g08810
At4g09980
At4g10320
At4g10340
At4g11010
At4g11380
At4g11420
At4g11560
At4g12420
At4g12610
At4g12780
At4g12800
At4g13340
At4g13770
At4g13780
At4g13930
At4g13940
At4g14040
At4g14360
At4g14440
At4g14480
At4g14680
At4g14880
At4g14960
At4g15020
At4g16130
At4g16190
At4g17330
At4g17830
At4g18030
At4g18820
At4g19120
At4g19210
At4g20360
At4g20850
At4g20890
At4g20960
At4g21150
At4g21160
At4g22150
At4g22690
At4g22720
At4g23630
At4g23650
At4g23730
At4g24510
At4g24620
At4g24800
At4g24830
At4g25130
At4g25960
At4g26630
At4g26900
At4g26910
At4g26970
At4g27000
At4g27430
At4g27560
At4g29010
At4g29060
At4g29120
At4g29810
At4g29900
At4g30530
At4g30800
At4g31130
At4g31340
At4g31490
At4g31580
At4g31700
At4g31770
At4g32285
At4g32410
At4g32640
At4g32770
At4g33010
At4g33030
At4g33090
At4g33150
At4g33650
At4g33680
At4g34180
At4g34240
At4g34490
At4g34740
At4g35300
At4g35800
At4g35830
At4g36130
At4g36250
At4g37000
At4g37300
At4g37550
At4g37870
At4g37930
At4g38350
At4g38460
At4g38510
At4g38680
At4g38740
At4g38800
At4g38900
At4g38970
At4g39080
At4g39280
At4g39330
At4g39660
At4g39690
At4g39860
At5g01530
At5g02960
At5g03340
At5g03630
At5g03740
At5g04140
At5g04430
At5g04590
At5g04710
At5g05170
At5g06110
At5g06390
At5g06530
At5g07300
At5g07350
At5g08280
At5g08300
At5g08450
At5g08540
At5g08680
At5g09810
At5g10010
At5g10360
At5g10540
At5g10730
At5g10860
At5g11200
At5g11560
At5g11670
At5g11880
At5g12250
At5g12950
At5g13480
At5g13520
At5g13640
At5g13710
At5g13850
At5g13980
At5g14740
At5g14780
At5g15090
At5g15200
At5g15350
At5g15400
At5g16510
At5g16590
At5g16780
At5g17050
At5g17380
At5g17770
At5g17920
At5g18100
At5g19220
At5g19290
At5g19370
At5g19440
At5g19510
At5g19620
At5g19690
At5g19770
At5g19820
At5g19990
At5g20020
At5g20290
At5g20720
At5g22640
At5g22650
At5g22740
At5g23120
At5g23900
At5g24300
At5g26000
At5g26710
At5g26742
At5g26860
At5g27630
At5g28540
At5g28840
At5g34850
At5g35360
At5g35430
At5g35630
At5g37510
At5g37600
At5g38420
At5g38470
At5g38530
At5g39080
At5g39410
At5g39500
At5g39570
At5g40340
At5g40450
At5g40490
At5g41790
At5g41970
At5g42390
At5g42820
At5g42950
At5g43130
At5g43330
At5g44100
At5g45160
At5g46290
At5g46570
At5g47040
At5g47650
At5g47860
At5g47870
At5g47930
At5g48375
At5g48440
At5g48480
At5g49460
At5g49555
At5g49910
At5g50230
At5g50920
At5g50950
At5g51200
At5g52320
At5g52920
At5g53460
At5g53480
At5g53850
At5g54810
At5g54900
At5g54960
At5g55040
At5g55670
At5g57110
At5g57460
At5g58270
At5g58410
At5g58870
At5g59370
At5g59750
At5g59820
At5g59910
At5g60540
At5g60640
At5g60980
At5g61150
At5g61640
At5g61780
At5g61790
At5g62020
At5g62530
At5g62670
At5g63260
At5g63550
At5g63570
At5g63620
At5g63860
At5g64350
At5g64370
At5g64740
At5g65750
At5g65760
At5g66040
At5g66420
At5g66530
At5g66570
At5g66680
At5g67500
At5g67610
AtCg00020
AtCg00120
AtCg00170
ATCG00270
AtCg00280
AtCg00340
AtCg00350
AtCg00480
AtCg00490
AtCg00680
AtCg00720
AtCg00800
AtCg00830
AtCg00860
AtMg00090
AtMg00480
AtMg00510
AtMg01190
At1g01080
At1g01510
At1g01610
At1g02080
At1g02140
At1g02280
At1g02500
At1g02560
At1g02780
At1g03475
At1g03630
At1g03680
At1g04270
At1g04410
At1g04430
At1g04820
At1g05500
At1g05805
At1g06290
At1g06550
At1g06680
At1g06950
At1g07350
At1g07810
At1g07890
At1g07940
At1g08110
At1g08135
At1g08200
At1g08450
At1g08470
At1g08480
At1g08550
At1g08830
At1g09100
At1g09210
At1g09340
At1g09620
At1g09780
At1g10290
At1g10670
At1g10760
At1g10950
At1g11260
At1g11580
At1g11650
At1g11840
At1g11860
At1g11910
At1g12050
At1g12240
At1g12900
At1g13020
At1g13060
At1g13280
At1g13440
At1g13930
At1g14810
At1g14830
At1g15690
At1g15750
At1g15820
At1g16610
At1g16820
At1g17290
At1g17840
At1g18080
At1g18210
At1g18450
At1g19570
At1g19920
At1g20010
At1g20020
At1g20340
At1g20620
At1g20960
At1g21750
At1g22710
At1g23190
At1g23290
At1g23310
At1g23410
At1g23820
At1g24010
At1g24180
At1g24360
At1g24706
At1g26630
At1g26850
At1g27090
At1g27680
At1g27970
At1g29350
At1g29880
At1g29900
At1g29910
At1g30120
At1g30230
At1g30360
At1g30380
At1g30400
At1g30510
At1g30580
At1g31190
At1g31230
At1g31330
At1g32060
At1g32470
At1g33140
At1g34130
At1g35680
At1g36160
At1g42550
At1g42970
At1g43170
At1g43670
At1g44575
At1g44910
At1g45201
At1g47128
At1g47260
At1g47420
At1g48030
At1g48410
At1g48600
At1g48605
At1g48850
At1g48920
At1g49670
At1g49760
At1g50250
At1g50480
At1g50700
At1g51410
At1g51980
At1g52280
At1g52400
At1g52570
At1g53210
At1g53500
At1g54040
At1g54270
At1g54410
At1g55480
At1g55510
At1g55670
At1g56070
At1g56190
At1g56340
At1g57660
At1g58380
At1g59870
At1g59900
At1g60200
At1g61520
At1g62020
At1g62560
At1g62750
At1g63000
At1g63180
At1g63500
At1g63770
At1g63940
At1g64190
At1g65440
At1g65860
At1g65930
At1g66200
At1g67090
At1g67230
At1g67730
At1g68020
At1g68530
At1g68560
At1g69620
At1g69830
At1g70310
At1g70410
At1g70490
At1g70730
At1g70770
At1g71500
At1g71695
At1g72370
At1g73600
At1g74260
At1g74910
At1g74960
At1g75780
At1g76030
At1g76100
At1g76150
At1g76180
At1g76680
At1g76810
At1g76880
At1g77060
At1g77180
At1g78370
At1g78570
At1g78850
At1g78880
At1g78900
At1g79040
At1g79230
At1g79440
At1g79550
At1g79920
At1g79930
At1g79990
At1g80300
At1g80410
At1g80480
At1g80660
At1g80930
At2g01140
At2g01720
At2g02160
At2g04030
At2g05100
At2g05710
At2g05830
At2g05990
At2g06050
At2g07050
At2g07360
At2g09990
At2g13560
At2g14170
At2g14720
At2g15620
At2g16485
At2g16600
At2g16940
At2g17420
At2g18020
At2g18960
At2g19520
At2g19730
At2g19760
At2g19940
At2g20190
At2g20260
At2g20360
At2g20580
At2g20610
At2g20990
At2g21060
At2g21170
At2g21330
At2g21390
At2g21410
At2g21530
At2g21590
At2g21660
At2g21880
At2g22125
At2g22230
At2g22250
At2g22480
At2g23350
At2g24200
At2g24270
At2g25450
At2g25670
At2g25970
At2g26040
At2g26080
At2g26250
At2g27100
At2g27210
At2g27860
At2g28000
At2g28190
At2g29360
At2g29550
At2g30110
At2g30620
At2g30790
At2g30950
At2g30970
At2g31390
At2g31570
At2g32730
At2g32920
At2g33150
At2g33380
At2g33410
At2g33800
At2g34420
At2g34430
At2g35010
At2g35040
At2g35410
At2g35490
At2g35810
At2g35920
At2g36130
At2g36160
At2g36250
At2g36290
At2g36380
At2g36390
At2g36460
At2g36530
At2g36580
At2g36620
At2g36830
At2g36880
At2g37220
At2g37550
At2g37970
At2g38280
At2g38290
At2g38670
At2g39730
At2g39800
At2g39850
At2g39990
At2g40100
At2g40490
At2g40840
At2g41220
At2g41530
At2g41560
At2g41740
At2g41840
At2g42500
At2g42600
At2g43030
At2g43090
At2g43100
At2g43750
At2g43910
At2g44050
At2g44160
At2g44640
At2g44920
At2g45290
At2g45300
At2g45440
At2g45540
At2g46070
At2g46280
At2g47240
At2g47390
At2g47470
At2g47510
At3g01120
At3g01280
At3g01340
At3g01500
At3g01670
At3g01680
At3g01780
At3g01910
At3g02090
At3g02360
At3g02720
At3g02770
At3g02880
At3g03250
At3g03780
At3g03960
At3g04790
At3g04840
At3g05280
At3g05420
At3g06050
At3g06510
At3g06580
At3g06670
At3g06810
At3g06850
At3g06860
At3g07110
At3g07390
At3g07770
At3g08510
At3g08580
At3g08680
At3g08940
At3g09440
At3g09630
At3g09790
At3g09820
At3g10920
At3g11130
At3g11210
At3g11400
At3g11630
At3g11910
At3g12110
At3g12290
At3g12390
At3g12580
At3g13300
At3g13470
At3g13860
At3g13870
At3g13930
At3g14067
At3g14100
At3g14415
At3g14420
At3g14990
At3g15020
At3g15360
At3g15520
At3g15730
At3g15980
At3g16110
At3g16400
At3g16640
At3g17390
At3g17810
At3g17970
At3g18035
At3g18780
At3g18820
At3g18890
At3g19010
At3g19170
At3g19760
At3g19820
At3g19930
At3g20320
At3g20920
At3g21560
At3g22200
At3g22330
At3g22890
At3g22960
At3g23400
At3g23700
At3g23810
At3g23840
At3g23940
At3g24170
At3g24503
At3g25150
At3g25920
At3g26340
At3g26400
At3g26520
At3g26650
At3g26710
At3g26720
At3g26740
At3g26935
At3g27240
At3g27300
At3g28730
At3g29075
At3g29320
At3g29360
At3g29630
At3g42170
At3g43300
At3g44110
At3g44310
At3g44320
At3g44330
At3g45030
At3g45190
At3g45780
At3g45980
At3g46040
At3g46060
At3g46740
At3g46780
At3g46970
At3g47370
At3g47470
At3g47520
At3g47650
At3g47950
At3g48000
At3g48560
At3g48680
At3g48720
At3g48730
At3g48870
At3g48990
At3g49010
At3g49430
At3g49470
At3g49680
At3g49720
At3g50670
At3g50820
At3g51160
At3g51880
At3g52150
At3g52880
At3g52930
At3g52960
At3g52990
At3g53420
At3g53430
At3g53460
At3g53580
At3g53720
At3g54050
At3g54470
At3g54560
At3g54660
At3g54760
At3g54960
At3g55010
At3g55120
At3g55360
At3g55410
At3g55440
At3g55800
At3g56150
At3g56240
At3g56340
At3g56940
At3g57410
At3g57490
At3g57610
At3g58610
At3g58990
At3g59760
At3g59970
At3g60240
At3g60750
At3g60770
At3g61440
At3g61870
At3g62030
At3g62360
At3g62700
At3g63140
At3g63410
At3g63460
At3g63490
At3g63520
At4g00360
At4g00400
At4g01310
At4g01370
At4g02510
At4g02580
At4g02770
At4g02930
At4g03200
At4g03280
At4g03520
At4g04020
At4g05020
At4g09010
At4g09320
At4g10320
At4g10340
At4g10960
At4g11010
At4g11220
At4g11420
At4g11820
At4g12420
At4g12800
At4g13430
At4g13770
At4g13840
At4g13850
At4g13930
At4g13940
At4g14040
At4g14070
At4g14160
At4g14360
At4g14440
At4g14480
At4g14880
At4g14960
At4g16155
At4g16450
At4g17100
At4g17390
At4g17520
At4g17600
At4g18030
At4g18290
At4g18430
At4g18480
At4g18820
At4g19710
At4g20110
At4g20360
At4g20890
At4g21710
At4g22240
At4g23630
At4g23650
At4g23670
At4g23730
At4g23850
At4g24190
At4g24280
At4g24510
At4g24620
At4g24680
At4g24770
At4g24830
At4g25130
At4g26630
At4g26870
At4g26900
At4g26910
At4g26970
At4g27000
At4g27230
At4g28750
At4g28770
At4g28910
At4g29010
At4g29060
At4g29120
At4g29220
At4g29260
At4g29350
At4g29410
At4g29680
At4g29840
At4g30190
At4g30530
At4g30910
At4g30920
At4g31180
At4g31490
At4g31990
At4g32520
At4g33010
At4g33030
At4g33090
At4g33510
At4g33680
At4g34110
At4g34200
At4g34450
At4g34870
At4g35100
At4g35260
At4g35470
At4g35630
At4g35790
At4g35800
At4g35830
At4g36020
At4g36130
At4g36195
At4g36250
At4g36690
At4g37300
At4g37870
At4g37910
At4g37930
At4g38130
At4g38350
At4g38510
At4g38600
At4g38680
At4g38740
At4g38780
At4g38800
At4g38970
At4g39080
At4g39090
At4g39210
At4g39260
At4g39330
At4g39660
At4g39680
At4g39730
At5g01530
At5g02240
At5g02490
At5g02500
At5g02960
At5g03040
At5g03300
At5g03340
At5g03560
At5g03630
At5g04140
At5g04430
At5g04590
At5g05010
At5g05670
At5g05740
At5g06060
At5g06290
At5g06530
At5g07350
At5g07440
At5g07460
At5g07470
At5g08280
At5g08300
At5g08450
At5g08530
At5g08680
At5g09300
At5g09590
At5g09660
At5g09810
At5g09880
At5g10360
At5g10470
At5g10540
At5g10730
At5g10920
At5g11200
At5g11490
At5g11560
At5g11670
At5g11680
At5g11710
At5g11770
At5g12250
At5g13420
At5g13440
At5g13490
At5g13850
At5g13980
At5g14030
At5g14040
At5g14220
At5g14740
At5g14780
At5g15090
At5g15350
At5g15650
At5g16590
At5g16780
At5g16840
At5g16990
At5g17050
At5g17380
At5g17530
At5g17770
At5g17920
At5g19220
At5g19390
At5g19440
At5g19510
At5g19550
At5g19760
At5g19770
At5g20010
At5g20290
At5g20350
At5g20720
At5g23020
At5g23060
At5g23120
At5g23860
At5g23890
At5g24300
At5g26000
At5g26210
At5g26280
At5g26570
At5g26742
At5g26860
At5g27380
At5g27540
At5g27640
At5g27700
At5g28500
At5g28540
At5g28840
At5g30510
At5g34850
At5g35160
At5g35360
At5g35590
At5g35630
At5g35790
At5g36210
At5g37360
At5g37510
At5g37600
At5g38420
At5g38470
At5g38530
At5g39410
At5g39570
At5g40340
At5g40450
At5g40490
At5g40760
At5g40810
At5g42020
At5g42270
At5g42790
At5g42820
At5g43830
At5g43940
At5g43960
At5g44130
At5g44320
At5g44340
At5g46070
At5g46110
At5g46290
At5g46750
At5g46800
At5g47110
At5g47210
At5g47650
At5g47690
At5g48180
At5g48230
At5g48300
At5g48375
At5g48440
At5g48480
At5g49460
At5g49720
At5g49910
At5g50000
At5g50250
At5g50850
At5g50920
At5g50950
At5g51820
At5g52310
At5g52470
At5g52520
At5g52560
At5g53460
At5g54190
At5g54270
At5g54500
At5g54810
At5g54900
At5g55220
At5g55660
At5g56010
At5g56260
At5g56630
At5g56680
At5g57290
At5g57870
At5g58140
At5g58330
At5g58420
At5g58440
At5g59350
At5g59910
At5g60160
At5g60660
At5g60980
At5g61780
At5g61790
At5g62200
At5g62530
At5g62670
At5g62690
At5g63310
At5g63840
At5g63860
At5g63890
At5g64350
At5g64860
At5g65750
At5g65760
At5g65770
At5g66040
At5g66190
At5g66510
At5g66570
At5g66680
At5g66720
At5g66760
At5g67030
At5g67500
AtCg00020
AtCg00120
AtCg00130
AtCg00270
AtCg00280
AtCg00340
AtCg00350
AtCg00480
AtCg00490
AtCg00500
AtCg00540
ATCG00580
AtCg00670
AtCg00680
AtCg00720
AtCg00750
AtCg00800
AtCg00830
AtCg01060
AtMg00070
AtMg00160
AtMg01190

## Sheet: Bates_2012
1
At5g67630
At5g67600
At5g67590
At5g67580
At5g67560
At5g67530
At5g67520
At5g67510
At5g67500
At5g67490
At5g67480
At5g67470
At5g67460
At5g67450
At5g67440
At5g67420
At5g67380
At5g67370
At5g67360
At5g67350
At5g67340
At5g67330
At5g67320
At5g67310
At5g67300
At5g67290
At5g67280
At5g67260
At5g67250
At5g67240
At5g67230
At5g67220
At5g67180
At5g67160
At5g67130
At5g67080
At5g67070
At5g67030
At5g67020
At5g66950
At5g66930
At5g66920
At5g66900
At5g66890
At5g66880
At5g66850
At5g66820
At5g66810
At5g66760
At5g66730
At5g66700
At5g66690
At5g66680
At5g66650
At5g66590
At5g66570
At5g66560
At5g66540
At5g66530
At5g66510
At5g66490
At5g66470
At5g66460
At5g66440
At5g66420
At5g66410
At5g66400
At5g66380
At5g66360
At5g66340
At5g66320
At5g66310
At5g66250
At5g66240
At5g66210
At5g66200
At5g66190
At5g66180
At5g66170
At5g66160
At5g66140
At5g66130
At5g66120
At5g66090
At5g66080
At5g66070
At5g66060
At5g66055
At5g66050
At5g66040
At5g66030
At5g66010
At5g65990
At5g65960
At5g65950
At5g65940
At5g65930
At5g65910
At5g65900
At5g65890
At5g65880
At5g65870
At5g65860
At5g65850
At5g65840
At5g65830
At5g65810
At5g65780
At5g65770
At5g65760
At5g65750
At5g65720
At5g65710
At5g65700
At5g65685
At5g65670
At5g65660
At5g65650
At5g65630
At5g65620
At5g65600
At5g65590
At5g65570
At5g65560
At5g65540
At5g65490
At5g65480
At5g65470
At5g65460
At5g65450
At5g65440
At5g65430
At5g65390
At5g65380
At5g65360
At5g65310
At5g65300
At5g65290
At5g65280
At5g65270
At5g65260
At5g65250
At5g65240
At5g65220
At5g65210
At5g65180
At5g65140
At5g65120
At5g65110
At5g65050
At5g65020
At5g65010
At5g65000
At5g64990
At5g64970
At5g64960
At5g64950
At5g64940
At5g64930
At5g64920
At5g64905
At5g64880
At5g64870
At5g64860
At5g64850
At5g64840
At5g64830
At5g64816
At5g64813
At5g64780
At5g64770
At5g64760
At5g64740
At5g64730
At5g64680
At5g64670
At5g64660
At5g64650
At5g64640
At5g64620
At5g64610
At5g64600
At5g64580
At5g64570
At5g64560
At5g64550
At5g64510
At5g64500
At5g64470
At5g64460
At5g64450
At5g64440
At5g64420
At5g64410
At5g64400
At5g64390
At5g64380
At5g64370
At5g64360
At5g64350
At5g64340
At5g64330
At5g64310
At5g64300
At5g64290
At5g64280
At5g64270
At5g64260
At5g64250
At5g64230
At5g64220
At5g64200
At5g64180
At5g64170
At5g64160
At5g64150
At5g64140
At5g64130
At5g64120
At5g64090
At5g64080
At5g64070
At5g64050
At5g64040
At5g64030
At5g64010
At5g63980
At5g63970
At5g63950
At5g63940
At5g63930
At5g63910
At5g63905
At5g63890
At5g63880
At5g63870
At5g63860
At5g63850
At5g63840
At5g63830
At5g63810
At5g63800
At5g63790
At5g63780
At5g63770
At5g63760
At5g63700
At5g63680
At5g63670
At5g63640
At5g63620
At5g63610
At5g63580
At5g63570
At5g63560
At5g63530
At5g63520
At5g63510
At5g63490
At5g63480
At5g63470
At5g63450
At5g63440
At5g63430
At5g63410
At5g63400
At5g63380
At5g63370
At5g63360
At5g63330
At5g63320
At5g63310
At5g63290
At5g63280
At5g63260
At5g63220
At5g63210
At5g63200
At5g63190
At5g63150
At5g63140
At5g63130
At5g63120
At5g63110
At5g63080
At5g63060
At5g63050
At5g63040
At5g63030
At5g63010
At5g63000
At5g62980
At5g62960
At5g62950
At5g62930
At5g62910
At5g62900
At5g62890
At5g62880
At5g62860
At5g62850
At5g62840
At5g62830
At5g62810
At5g62790
At5g62740
At5g62730
At5g62720
At5g62690
At5g62680
At5g62670
At5g62650
At5g62640
At5g62630
At5g62620
At5g62610
At5g62590
At5g62580
At5g62575
At5g62570
At5g62540
At5g62530
At5g62520
At5g62500
At5g62470
At5g62460
At5g62450
At5g62440
At5g62430
At5g62410
At5g62390
At5g62360
At5g62350
At5g62290
At5g62260
At5g62230
At5g62220
At5g62200
At5g62190
At5g62150
At5g62140
At5g62130
At5g62100
At5g62090
At5g62070
At5g62050
At5g62030
At5g62020
At5g62010
At5g62000
At5g61980
At5g61970
At5g61960
At5g61930
At5g61920
At5g61910
At5g61900
At5g61890
At5g61880
At5g61865
At5g61840
At5g61830
At5g61820
At5g61810
At5g61800
At5g61790
At5g61780
At5g61770
At5g61760
At5g61700
At5g61670
At5g61640
At5g61600
At5g61590
At5g61580
At5g61560
At5g61530
At5g61510
At5g61500
At5g61450
At5g61440
At5g61410
At5g61380
At5g61370
At5g61360
At5g61330
At5g61310
At5g61240
At5g61230
At5g61220
At5g61210
At5g61190
At5g61170
At5g61150
At5g61140
At5g61090
At5g61060
At5g61040
At5g61020
At5g61010
At5g61000
At5g60990
At5g60980
At5g60960
At5g60950
At5g60940
At5g60920
At5g60900
At5g60870
At5g60860
At5g60850
At5g60820
At5g60790
At5g60750
At5g60730
At5g60710
At5g60690
At5g60680
At5g60670
At5g60640
At5g60630
At5g60620
At5g60610
At5g60600
At5g60590
At5g60570
At5g60550
At5g60540
At5g60490
At5g60460
At5g60450
At5g60440
At5g60420
At5g60400
At5g60390
At5g60360
At5g60300
At5g60270
At5g60230
At5g60210
At5g60170
At5g60160
At5g60120
At5g60100
At5g60040
At5g60030
At5g59980
At5g59960
At5g59950
At5g59940
At5g59910
At5g59890
At5g59880
At5g59870
At5g59850
At5g59845
At5g59840
At5g59830
At5g59820
At5g59800
At5g59770
At5g59750
At5g59740
At5g59730
At5g59710
At5g59690
At5g59610
At5g59560
At5g59550
At5g59540
At5g59520
At5g59500
At5g59490
At5g59480
At5g59460
At5g59450
At5g59440
At5g59430
At5g59420
At5g59410
At5g59400
At5g59380
At5g59350
At5g59300
At5g59290
At5g59220
At5g59210
At5g59180
At5g59160
At5g59150
At5g59140
At5g59080
At5g59070
At5g59050
At5g59030
At5g59020
At5g59000
At5g58980
At5g58970
At5g58950
At5g58930
At5g58920
At5g58900
At5g58870
At5g58800
At5g58790
At5g58787
At5g58770
At5g58760
At5g58740
At5g58730
At5g58720
At5g58710
At5g58700
At5g58690
At5g58670
At5g58660
At5g58650
At5g58640
At5g58620
At5g58600
At5g58590
At5g58580
At5g58575
At5g58560
At5g58540
At5g58530
At5g58510
At5g58490
At5g58470
At5g58450
At5g58440
At5g58430
At5g58420
At5g58410
At5g58380
At5g58375
At5g58370
At5g58350
At5g58340
At5g58330
At5g58290
At5g58270
At5g58260
At5g58250
At5g58240
At5g58230
At5g58220
At5g58210
At5g58200
At5g58190
At5g58150
At5g58140
At5g58130
At5g58120
At5g58110
At5g58090
At5g58070
At5g58060
At5g58040
At5g58030
At5g58020
At5g58000
At5g57990
At5g57960
At5g57950
At5g57940
At5g57930
At5g57920
At5g57910
At5g57900
At5g57890
At5g57880
At5g57870
At5g57860
At5g57850
At5g57830
At5g57815
At5g57800
At5g57760
At5g57740
At5g57710
At5g57660
At5g57655
At5g57630
At5g57610
At5g57590
At5g57580
At5g57570
At5g57560
At5g57510
At5g57490
At5g57480
At5g57460
At5g57410
At5g57360
At5g57345
At5g57340
At5g57330
At5g57300
At5g57290
At5g57280
At5g57230
At5g57220
At5g57180
At5g57170
At5g57160
At5g57150
At5g57140
At5g57120
At5g57110
At5g57100
At5g57080
At5g57070
At5g57060
At5g57050
At5g57040
At5g57030
At5g57020
At5g57000
At5g56980
At5g56940
At5g56910
At5g56900
At5g56870
At5g56850
At5g56790
At5g56760
At5g56750
At5g56740
At5g56730
At5g56710
At5g56670
At5g56650
At5g56630
At5g56610
At5g56600
At5g56590
At5g56520
At5g56500
At5g56460
At5g56450
At5g56360
At5g56350
At5g56340
At5g56290
At5g56280
At5g56270
At5g56260
At5g56250
At5g56240
At5g56230
At5g56220
At5g56200
At5g56190
At5g56185
At5g56180
At5g56170
At5g56160
At5g56150
At5g56140
At5g56130
At5g56100
At5g56090
At5g56030
At5g56020
At5g56000
At5g55990
At5g55970
At5g55960
At5g55940
At5g55930
At5g55915
At5g55910
At5g55860
At5g55850
At5g55840
At5g55790
At5g55760
At5g55740
At5g55730
At5g55710
At5g55700
At5g55670
At5g55660
At5g55650
At5g55640
At5g55630
At5g55620
At5g55610
At5g55600
At5g55560
At5g55550
At5g55540
At5g55530
At5g55500
At5g55480
At5g55400
At5g55390
At5g55380
At5g55370
At5g55310
At5g55300
At5g55290
At5g55280
At5g55260
At5g55230
At5g55220
At5g55210
At5g55200
At5g55190
At5g55180
At5g55160
At5g55140
At5g55130
At5g55120
At5g55100
At5g55090
At5g55070
At5g55060
At5g55050
At5g55030
At5g55000
At5g54980
At5g54960
At5g54950
At5g54940
At5g54930
At5g54910
At5g54900
At5g54870
At5g54860
At5g54855
At5g54850
At5g54840
At5g54830
At5g54800
At5g54780
At5g54770
At5g54760
At5g54750
At5g54730
At5g54720
At5g54690
At5g54680
At5g54670
At5g54650
At5g54640
At5g54630
At5g54600
At5g54580
At5g54540
At5g54530
At5g54520
At5g54510
At5g54500
At5g54490
At5g54470
At5g54440
At5g54430
At5g54390
At5g54380
At5g54310
At5g54300
At5g54290
At5g54280
At5g54270
At5g54260
At5g54200
At5g54180
At5g54170
At5g54160
At5g54140
At5g54130
At5g54110
At5g54100
At5g54090
At5g54080
At5g53970
At5g53940
At5g53900
At5g53890
At5g53880
At5g53860
At5g53850
At5g53800
At5g53760
At5g53750
At5g53650
At5g53620
At5g53590
At5g53580
At5g53570
At5g53560
At5g53550
At5g53540
At5g53530
At5g53490
At5g53485
At5g53480
At5g53470
At5g53460
At5g53450
At5g53440
At5g53430
At5g53420
At5g53400
At5g53370
At5g53360
At5g53350
At5g53340
At5g53330
At5g53310
At5g53280
At5g53220
At5g53180
At5g53170
At5g53160
At5g53150
At5g53140
At5g53130
At5g53120
At5g53090
At5g53070
At5g53060
At5g53050
At5g53030
At5g53020
At5g53010
At5g53000
At5g52980
At5g52975
At5g52960
At5g52920
At5g52880
At5g52840
At5g52830
At5g52820
At5g52810
At5g52760
At5g52750
At5g52710
At5g52660
At5g52650
At5g52640
At5g52630
At5g52590
At5g52580
At5g52570
At5g52560
At5g52550
At5g52530
At5g52520
At5g52510
At5g52470
At5g52460
At5g52440
At5g52430
At5g52420
At5g52380
At5g52370
At5g52310
At5g52280
At5g52250
At5g52240
At5g52230
At5g52210
At5g52200
At5g52190
At5g52180
At5g52120
At5g52110
At5g52070
At5g52060
At5g52040
At5g52030
At5g52010
At5g51980
At5g51970
At5g51960
At5g51940
At5g51910
At5g51880
At5g51840
At5g51830
At5g51820
At5g51770
At5g51750
At5g51740
At5g51710
At5g51700
At5g51690
At5g51660
At5g51640
At5g51620
At5g51590
At5g51570
At5g51550
At5g51540
At5g51510
At5g51470
At5g51460
At5g51440
At5g51430
At5g51410
At5g51400
At5g51390
At5g51380
At5g51350
At5g51340
At5g51300
At5g51280
At5g51260
At5g51240
At5g51230
At5g51220
At5g51200
At5g51190
At5g51180
At5g51170
At5g51140
At5g51130
At5g51120
At5g51110
At5g51100
At5g51070
At5g51050
At5g51040
At5g51020
At5g51010
At5g50970
At5g50960
At5g50950
At5g50940
At5g50920
At5g50915
At5g50900
At5g50870
At5g50860
At5g50850
At5g50840
At5g50810
At5g50780
At5g50720
At5g50630
At5g50580
At5g50570
At5g50565
At5g50550
At5g50530
At5g50460
At5g50450
At5g50440
At5g50420
At5g50410
At5g50400
At5g50380
At5g50370
At5g50350
At5g50340
At5g50330
At5g50320
At5g50310
At5g50280
At5g50270
At5g50250
At5g50240
At5g50230
At5g50210
At5g50200
At5g50180
At5g50170
At5g50130
At5g50110
At5g50100
At5g50020
At5g50000
At5g49990
At5g49980
At5g49970
At5g49960
At5g49950
At5g49940
At5g49930
At5g49910
At5g49900
At5g49890
At5g49880
At5g49840
At5g49830
At5g49820
At5g49810
At5g49780
At5g49760
At5g49730
At5g49720
At5g49710
At5g49700
At5g49680
At5g49650
At5g49640
At5g49610
At5g49580
At5g49570
At5g49550
At5g49540
At5g49530
At5g49520
At5g49510
At5g49500
At5g49480
At5g49470
At5g49460
At5g49450
At5g49430
At5g49410
At5g49400
At5g49360
At5g49280
At5g49270
At5g49230
At5g49220
At5g49210
At5g49160
At5g49070
At5g49060
At5g49030
At5g49010
At5g49000
At5g48990
At5g48970
At5g48960
At5g48950
At5g48930
At5g48910
At5g48880
At5g48870
At5g48840
At5g48830
At5g48810
At5g48790
At5g48760
At5g48720
At5g48655
At5g48640
At5g48630
At5g48600
At5g48590
At5g48580
At5g48570
At5g48540
At5g48520
At5g48490
At5g48485
At5g48480
At5g48470
At5g48460
At5g48450
At5g48430
At5g48410
At5g48400
At5g48380
At5g48370
At5g48340
At5g48330
At5g48300
At5g48260
At5g48250
At5g48240
At5g48230
At5g48220
At5g48180
At5g48150
At5g48120
At5g48030
At5g48020
At5g47970
At5g47940
At5g47930
At5g47910
At5g47900
At5g47890
At5g47880
At5g47840
At5g47830
At5g47820
At5g47780
At5g47770
At5g47760
At5g47750
At5g47730
At5g47710
At5g47700
At5g47690
At5g47680
At5g47670
At5g47650
At5g47640
At5g47620
At5g47610
At5g47580
At5g47570
At5g47560
At5g47550
At5g47540
At5g47520
At5g47480
At5g47440
At5g47435
At5g47430
At5g47420
At5g47410
At5g47400
At5g47390
At5g47380
At5g47360
At5g47350
At5g47340
At5g47330
At5g47320
At5g47310
At5g47240
At5g47230
At5g47220
At5g47210
At5g47200
At5g47190
At5g47180
At5g47130
At5g47120
At5g47110
At5g47100
At5g47090
At5g47080
At5g47070
At5g47060
At5g47050
At5g47040
At5g47030
At5g47020
At5g47010
At5g46920
At5g46910
At5g46860
At5g46850
At5g46840
At5g46800
At5g46790
At5g46780
At5g46760
At5g46750
At5g46710
At5g46700
At5g46680
At5g46640
At5g46630
At5g46620
At5g46580
At5g46550
At5g46520
At5g46500
At5g46480
At5g46470
At5g46460
At5g46450
At5g46420
At5g46410
At5g46400
At5g46390
At5g46350
At5g46340
At5g46330
At5g46295
At5g46290
At5g46250
At5g46240
At5g46230
At5g46210
At5g46190
At5g46180
At5g46160
At5g46150
At5g46140
At5g46110
At5g46080
At5g46070
At5g46050
At5g46040
At5g46030
At5g46020
At5g45940
At5g45920
At5g45910
At5g45900
At5g45800
At5g45760
At5g45750
At5g45710
At5g45680
At5g45620
At5g45610
At5g45600
At5g45590
At5g45550
At5g45510
At5g45500
At5g45490
At5g45480
At5g45430
At5g45420
At5g45410
At5g45400
At5g45390
At5g45380
At5g45370
At5g45360
At5g45350
At5g45340
At5g45300
At5g45280
At5g45270
At5g45260
At5g45250
At5g45230
At5g45190
At5g45170
At5g45160
At5g45140
At5g45130
At5g45110
At5g45050
At5g45020
At5g45010
At5g45000
At5g44990
At5g44980
At5g44930
At5g44920
At5g44910
At5g44870
At5g44860
At5g44800
At5g44790
At5g44785
At5g44780
At5g44750
At5g44720
At5g44710
At5g44680
At5g44650
At5g44580
At5g44550
At5g44530
At5g44520
At5g44450
At5g44410
At5g44390
At5g44380
At5g44370
At5g44340
At5g44320
At5g44290
At5g44280
At5g44250
At5g44240
At5g44210
At5g44200
At5g44190
At5g44180
At5g44170
At5g44150
At5g44130
At5g44110
At5g44090
At5g44080
At5g44070
At5g44060
At5g44020
At5g44000
At5g43970
At5g43960
At5g43940
At5g43930
At5g43920
At5g43910
At5g43900
At5g43880
At5g43870
At5g43860
At5g43850
At5g43830
At5g43810
At5g43790
At5g43780
At5g43760
At5g43740
At5g43710
At5g43680
At5g43670
At5g43640
At5g43600
At5g43560
At5g43500
At5g43490
At5g43460
At5g43450
At5g43440
At5g43430
At5g43390
At5g43330
At5g43320
At5g43310
At5g43280
At5g43270
At5g43260
At5g43190
At5g43170
At5g43150
At5g43140
At5g43130
At5g43100
At5g43080
At5g43070
At5g43060
At5g43040
At5g43020
At5g43010
At5g42990
At5g42980
At5g42970
At5g42960
At5g42950
At5g42940
At5g42920
At5g42900
At5g42890
At5g42870
At5g42850
At5g42830
At5g42820
At5g42810
At5g42790
At5g42765
At5g42760
At5g42740
At5g42670
At5g42660
At5g42650
At5g42570
At5g42560
At5g42540
At5g42520
At5g42480
At5g42470
At5g42440
At5g42420
At5g42400
At5g42390
At5g42380
At5g42370
At5g42360
At5g42320
At5g42310
At5g42300
At5g42270
At5g42240
At5g42220
At5g42190
At5g42150
At5g42140
At5g42130
At5g42100
At5g42090
At5g42080
At5g42070
At5g42060
At5g42050
At5g42030
At5g42010
At5g42000
At5g41990
At5g41970
At5g41960
At5g41950
At5g41940
At5g41930
At5g41900
At5g41870
At5g41850
At5g41810
At5g41800
At5g41790
At5g41770
At5g41760
At5g41740
At5g41700
At5g41685
At5g41670
At5g41650
At5g41640
At5g41620
At5g41610
At5g41600
At5g41580
At5g41560
At5g41520
At5g41480
At5g41460
At5g41410
At5g41400
At5g41370
At5g41350
At5g41340
At5g41330
At5g41320
At5g41270
At5g41260
At5g41240
At5g41220
At5g41210
At5g41190
At5g41180
At5g41150
At5g41140
At5g41100
At5g41090
At5g41080
At5g41070
At5g41060
At5g41050
At5g41040
At5g41010
At5g40950
At5g40930
At5g40890
At5g40880
At5g40870
At5g40850
At5g40840
At5g40810
At5g40780
At5g40770
At5g40760
At5g40740
At5g40730
At5g40710
At5g40690
At5g40680
At5g40670
At5g40660
At5g40650
At5g40640
At5g40610
At5g40600
At5g40580
At5g40550
At5g40540
At5g40530
At5g40520
At5g40500
At5g40490
At5g40480
At5g40470
At5g40460
At5g40450
At5g40440
At5g40390
At5g40370
At5g40340
At5g40330
At5g40300
At5g40280
At5g40250
At5g40210
At5g40200
At5g40190
At5g40170
At5g40160
At5g40150
At5g40060
At5g39990
At5g39960
At5g39950
At5g39940
At5g39900
At5g39890
At5g39850
At5g39830
At5g39790
At5g39785
At5g39780
At5g39760
At5g39740
At5g39730
At5g39710
At5g39670
At5g39660
At5g39610
At5g39600
At5g39590
At5g39580
At5g39570
At5g39510
At5g39500
At5g39410
At5g39380
At5g39360
At5g39340
At5g39320
At5g39250
At5g39220
At5g39190
At5g39090
At5g39080
At5g39050
At5g39040
At5g39030
At5g39020
At5g38990
At5g38980
At5g38900
At5g38895
At5g38890
At5g38880
At5g38850
At5g38840
At5g38830
At5g38820
At5g38720
At5g38710
At5g38690
At5g38660
At5g38650
At5g38630
At5g38610
At5g38560
At5g38530
At5g38520
At5g38510
At5g38480
At5g38470
At5g38460
At5g38380
At5g38350
At5g38310
At5g38290
At5g38240
At5g38220
At5g38150
At5g38140
At5g38110
At5g38030
At5g37930
At5g37890
At5g37850
At5g37830
At5g37780
At5g37770
At5g37740
At5g37710
At5g37670
At5g37600
At5g37590
At5g37580
At5g37550
At5g37540
At5g37510
At5g37500
At5g37490
At5g37480
At5g37450
At5g37440
At5g37380
At5g37370
At5g37360
At5g37350
At5g37310
At5g37260
At5g37230
At5g37180
At5g37160
At5g37130
At5g37070
At5g37055
At5g37020
At5g37010
At5g36940
At5g36890
At5g36880
At5g36700
At5g36290
At5g36250
At5g36230
At5g36220
At5g36210
At5g36170
At5g36160
At5g35990
At5g35980
At5g35970
At5g35930
At5g35910
At5g35840
At5g35830
At5g35790
At5g35750
At5g35735
At5g35730
At5g35700
At5g35690
At5g35680
At5g35630
At5g35620
At5g35570
At5g35560
At5g35530
At5g35520
At5g35490
At5g35460
At5g35440
At5g35430
At5g35410
At5g35370
At5g35360
At5g35330
At5g35320
At5g35210
At5g35200
At5g35180
At5g35170
At5g35160
At5g35100
At5g35080
At5g34940
At5g34930
At5g34850
At5g33390
At5g33290
At5g33280
At5g32470
At5g32450
At5g32440
At5g30145
At5g29771
At5g29000
At5g28910
At5g28900
At5g28840
At5g28820
At5g28770
At5g28750
At5g28740
At5g28630
At5g28540
At5g28530
At5g28500
At5g28430
At5g28400
At5g28370
At5g28300
At5g28150
At5g28060
At5g28050
At5g28040
At5g28020
At5g27990
At5g27970
At5g27950
At5g27930
At5g27920
At5g27860
At5g27850
At5g27840
At5g27830
At5g27800
At5g27770
At5g27760
At5g27750
At5g27740
At5g27730
At5g27720
At5g27710
At5g27700
At5g27670
At5g27660
At5g27650
At5g27630
At5g27620
At5g27610
At5g27600
At5g27560
At5g27540
At5g27520
At5g27490
At5g27470
At5g27460
At5g27450
At5g27430
At5g27420
At5g27400
At5g27390
At5g27380
At5g27360
At5g27350
At5g27330
At5g27320
At5g27290
At5g27280
At5g27220
At5g27210
At5g27150
At5g27110
At5g27010
At5g26990
At5g26980
At5g26960
At5g26940
At5g26920
At5g26910
At5g26880
At5g26860
At5g26850
At5g26830
At5g26820
At5g26780
At5g26770
At5g26760
At5g26734
At5g26731
At5g26718
At5g26707
At5g26675
At5g26605
At5g26595
At5g26570
At5g26360
At5g26340
At5g26280
At5g26270
At5g26240
At5g26230
At5g26220
At5g26210
At5g26110
At5g26040
At5g26030
At5g25980
At5g25940
At5g25930
At5g25900
At5g25890
At5g25840
At5g25830
At5g25820
At5g25810
At5g25800
At5g25780
At5g25770
At5g25760
At5g25640
At5g25630
At5g25610
At5g25560
At5g25540
At5g25520
At5g25510
At5g25490
At5g25450
At5g25440
At5g25360
At5g25350
At5g25280
At5g25270
At5g25260
At5g25240
At5g25220
At5g25210
At5g25170
At5g25150
At5g25100
At5g25080
At5g25070
At5g25060
At5g25040
At5g24980
At5g24970
At5g24950
At5g24930
At5g24890
At5g24870
At5g24850
At5g24840
At5g24830
At5g24810
At5g24760
At5g24740
At5g24730
At5g24710
At5g24700
At5g24690
At5g24670
At5g24660
At5g24650
At5g24630
At5g24620
At5g24610
At5g24600
At5g24590
At5g24570
At5g24530
At5g24520
At5g24500
At5g24490
At5g24480
At5g24470
At5g24460
At5g24450
At5g24430
At5g24420
At5g24400
At5g24390
At5g24380
At5g24360
At5g24350
At5g24320
At5g24310
At5g24300
At5g24290
At5g24280
At5g24270
At5g24260
At5g24210
At5g24170
At5g24165
At5g24150
At5g24120
At5g24090
At5g24030
At5g24020
At5g24010
At5g24000
At5g23920
At5g23900
At5g23890
At5g23880
At5g23870
At5g23860
At5g23850
At5g23760
At5g23740
At5g23730
At5g23720
At5g23710
At5g23690
At5g23670
At5g23630
At5g23610
At5g23590
At5g23580
At5g23570
At5g23550
At5g23540
At5g23530
At5g23520
At5g23510
At5g23480
At5g23460
At5g23450
At5g23440
At5g23430
At5g23405
At5g23390
At5g23340
At5g23330
At5g23310
At5g23300
At5g23290
At5g23270
At5g23250
At5g23240
At5g23230
At5g23170
At5g23150
At5g23140
At5g23130
At5g23120
At5g23110
At5g23090
At5g23080
At5g23070
At5g23060
At5g23050
At5g22970
At5g22950
At5g22940
At5g22920
At5g22880
At5g22875
At5g22850
At5g22840
At5g22830
At5g22820
At5g22770
At5g22760
At5g22740
At5g22730
At5g22710
At5g22700
At5g22690
At5g22650
At5g22640
At5g22630
At5g22620
At5g22580
At5g22540
At5g22530
At5g22510
At5g22480
At5g22450
At5g22440
At5g22390
At5g22370
At5g22360
At5g22340
At5g22330
At5g22320
At5g22310
At5g22300
At5g22290
At5g22280
At5g22270
At5g22250
At5g22220
At5g22060
At5g22030
At5g22000
At5g21170
At5g21160
At5g21110
At5g21105
At5g21100
At5g21090
At5g21070
At5g21060
At5g21050
At5g21040
At5g21010
At5g20990
At5g20980
At5g20960
At5g20950
At5g20930
At5g20920
At5g20910
At5g20900
At5g20890
At5g20885
At5g20870
At5g20840
At5g20830
At5g20810
At5g20790
At5g20730
At5g20720
At5g20700
At5g20690
At5g20680
At5g20660
At5g20650
At5g20620
At5g20610
At5g20600
At5g20590
At5g20580
At5g20570
At5g20540
At5g20530
At5g20520
At5g20500
At5g20480
At5g20470
At5g20410
At5g20400
At5g20380
At5g20360
At5g20350
At5g20300
At5g20290
At5g20280
At5g20270
At5g20250
At5g20240
At5g20230
At5g20220
At5g20200
At5g20180
At5g20170
At5g20160
At5g20150
[truncated: 11,097 more rows]

## Sheet: Wang_2011
AGI #
AT1G69480
AT1G56600
AT2G46270
AT4G27410
AT1G01520
AT5G11110
AT3G63060
AT5G59220
AT2G32510
AT2G36640
AT4G01120
AT3G02480
AT4G35560
AT3G16990
AT2G47780
AT5G01520
AT2G47770
AT4G27840
AT2G39450
AT3G11410
AT3G57520
AT1G05100
AT1G07430
AT5G62130
AT4G21440
AT1G10370
AT3G23920
AT1G52690
AT5G04250
AT3G57540
AT1G16850
AT5G10930
AT4G33905
AT2G04350
AT4G12130
AT5G05220
AT1G20030
AT1G49450
AT5G44110
AT1G07870
AT1G73920
AT1G75800
AT3G01510
AT3G15357
AT1G77680
AT1G53560
AT5G62490
AT1G77280
AT4G34000
AT4G38400
AT4G05100
AT3G29575
AT5G20070
AT1G23070
AT5G59480
AT3G62590
AT1G14530
AT1G29330
AT5G45690
AT5G67300
AT2G40170
AT1G13740
AT3G55940
AT5G01670
AT1G19970
AT1G78680
AT1G21790
AT1G72770
AT2G41870
AT3G48510
AT3G17520
AT5G57900
AT1G69260
AT5G44670
AT5G13930
AT4G17550
AT5G50360
AT3G12510
AT3G04460
AT1G58270
AT4G25480
AT1G60190
AT3G01590
AT1G10760
AT1G32560
AT3G24840
AT3G46450
AT2G19580
AT5G08640
AT5G06760
AT2G35300
AT5G64210
AT3G16910
AT5G57030
AT2G38820
AT5G05270
AT5G61810
AT2G02810
AT5G52300
AT5G01600
AT5G01880
AT5G47640
AT1G18460
AT1G79270
AT3G56090
AT5G52660
AT1G30640
AT5G57050
AT5G10730
AT4G30960
AT2G25530
AT1G34630
AT4G23050
AT5G22290
AT1G53670
AT1G51140
AT1G71960
AT5G24850
AT4G04870
253590_at
AT1G56170
AT2G39030
AT3G10420
AT2G43018
AT5G64080
AT3G53420
AT3G59220
AT1G17550
AT3G22740
AT2G25625
AT5G66650
AT1G04220
AT2G34850
AT3G14180
AT2G19810
AT3G47080
AT3G14595
AT1G32550
AT1G10560
AT5G65990
AT5G17980
AT5G09930
AT1G27200
AT5G67370
AT2G44660
AT1G62570
AT3G18170
AT3G15520
AT4G35550
AT4G22240
AT5G63380
AT3G51990
AT4G08980
AT1G68470
AT2G24150
AT4G01026
AT1G48840
AT3G59052
AT5G53710
AT1G01250
AT5G37550
AT5G58700
AT1G62710
AT3G05890
AT5G60790
AT5G66400
AT5G64260
267315_at
AT3G56080
AT1G09180
AT2G39050
AT5G61670
AT3G15500
AT3G11050
AT5G12840
AT5G62580
AT5G01820
AT4G29190
AT4G27560
AT2G03760
AT3G23580
AT1G73480
AT2G32800
AT3G02140
AT4G17420
AT4G16146
AT1G67960
AT1G16520
254199_at
AT5G55470
AT3G53040
AT1G77450
AT4G11570
AT4G35510
AT5G45920
AT5G43400
AT1G70900
AT5G52570
AT4G32770
AT5G16990
AT1G06570
AT2G25620
AT2G35700
AT5G52420
AT1G10360
AT1G16290
AT4G11370
AT3G08630
AT3G54250
AT2G04400
AT2G18700
AT1G79520
AT5G57040
AT2G21130
AT3G18350
AT4G37470
AT4G02360
AT5G07250
AT1G09210
AT3G15670
AT3G13040
AT4G00370
AT5G56180
AT3G54680
AT4G34930
AT1G01570
AT1G23750
AT5G45630
AT2G41190
AT4G28140
AT5G63330
AT4G15120
AT1G18360
AT5G03080
AT1G15180
AT5G15190
AT3G17000
AT3G05820
AT5G55090
AT2G21820
AT5G59490
AT3G50760
AT4G31750
AT2G22200
AT5G37260
AT3G03170
AT5G47420
AT1G72240
AT3G51000
AT1G20070
AT5G46410
AT4G25580
AT1G63710
AT1G27150
AT1G07500
AT1G70782
AT2G31940
AT1G24600
AT3G53620
AT5G43430
AT5G62100
AT1G71940
AT5G25220
AT5G62090
AT2G29730
AT1G44446
AT5G03160
AT2G45980
AT2G33700
AT1G08040
AT3G03790
AT5G65890
AT3G50850
AT5G59320
AT5G62480
AT4G22920
AT1G03630
AT2G39020
AT5G60850
AT1G71080
AT1G10960
AT1G21780
AT5G59570
AT4G31290
AT1G78610
AT2G37980
AT1G77120
AT2G37750
AT1G64110
AT5G67030
AT5G51990
AT5G27150
AT1G53170
AT3G24190
AT4G12000
AT1G19190
AT2G45300
AT4G30470
AT4G36600
AT1G17050
AT1G67300
AT5G48930
AT2G44060
AT1G01240
AT5G47240
AT4G10730
AT2G37770
AT2G47670
AT3G03150
AT5G20360
AT5G24080
AT3G54960
AT1G09350
AT5G58650
AT3G61630
AT3G56260
AT3G24170
AT2G22080
AT3G25870
AT4G22320
AT5G61370
AT4G24130
AT1G12370
AT1G20310
AT1G15740
AT5G66460
AT2G01490
AT1G19650
AT1G78070
AT4G40070
AT5G65630
AT2G25520
AT4G25520
AT5G09620
AT2G42540
AT4G18700
AT5G58800
AT3G04730
AT3G12480
AT5G20830
248544_at
AT1G74370
AT1G50010
AT1G30690
AT5G11060
AT5G53280
AT5G59350
AT1G73170
AT3G02875
AT5G61520
AT2G20370
AT3G05630
AT3G62980
AT2G33380
AT5G17050
AT5G07330
AT5G13180
AT4G39800
AT1G13640
AT4G34240
AT1G01470
AT5G17360
AT5G19070
AT4G36900
AT2G18230
AT1G78050
AT2G38550
AT3G53470
AT5G64780
AT1G48100
AT2G05260
AT5G20270
AT1G80240
AT5G57345
AT5G11460
AT1G30500
AT1G45230
AT2G46510
AT5G47650
AT1G54830
AT3G09910
AT3G02570
AT5G43150
AT2G22470
AT1G76390
AT2G22450
AT5G54300
AT2G47720
AT4G16540
AT3G05880
AT2G22690
AT2G22590
AT4G38060
AT3G15540
AT1G19860
AT1G30260
AT2G41540
AT1G75030
AT3G62600
AT1G20823
AT2G16260
AT1G71350
AT1G32870
AT1G78570
AT3G61450
AT2G15970
AT5G01260
AT5G39570
AT2G26570
AT2G18915
AT4G24800
AT5G66410
AT1G02340
AT2G30550
AT2G45990
AT5G61820
AT4G23730
AT5G64170
AT5G45950
AT1G73400
AT5G27520
AT2G39700
AT1G73390
AT5G35080
AT2G38340
AT5G67290
AT4G11600
AT2G17990
AT5G63640
AT1G08920
AT4G36960
AT2G21970
AT5G59150
AT4G16190
AT3G60540
AT3G09390
AT2G42790
AT3G01650
AT5G57610
AT5G04000
AT1G21660
AT3G15200
AT1G75770
AT3G22530
AT3G13620
AT5G25610
AT2G31270
AT3G43210
AT3G03250
AT4G38360
AT1G54130
AT4G25490
AT2G24540
AT1G27910
AT5G62220
AT4G18530
AT5G53290
AT1G24340
AT1G52890
AT1G29390
AT3G19100
AT2G21300
AT1G22640
AT5G17490
AT5G47050
AT1G04230
AT2G30360
AT1G66130
AT5G47330
AT4G19390
AT3G44735
AT5G05200
AT3G03900
AT1G67310
AT5G51550
AT3G55030
AT5G64550
AT1G04240
AT5G52310
AT3G06500
AT1G23740
AT1G11840
AT4G26080
AT5G55990
AT1G68440
AT4G35790
AT3G56330
AT4G02280
AT3G23570
AT4G14900
AT1G62720
AT1G03905
AT2G32415
AT2G43330
AT5G64450
AT3G23840
AT2G46670
AT2G34810
AT3G54950
AT5G35460
AT4G00900
AT3G54820
AT3G49880
AT1G10740
AT5G41460
AT5G10190
AT1G10410
AT1G48830
AT5G54510
AT5G57790
AT5G66780
AT5G57300
AT1G06780
AT4G02370
AT4G25990
AT2G46370
AT2G40300
AT3G21780
AT4G27260
AT2G40830
AT1G23040
AT5G39410
AT1G21670
AT3G51810
AT5G24970
AT1G04920
AT2G18170
AT2G43570
AT2G25880
AT5G03240
AT4G31920
AT2G36830
AT1G31230
AT5G47550
AT1G09960
AT1G06430
AT4G01280
AT2G45910
AT1G68552
AT1G70480
AT3G05640
AT1G30120
AT4G11220
AT2G46800
AT5G18450
AT5G41600
AT3G55500
AT1G08500
AT5G59310
AT4G39660
AT4G18270
AT1G52830
AT3G21865
AT3G62690
AT5G15910
AT5G17210
AT5G16010
AT1G21980
AT4G29330
AT1G20650
AT2G45600
AT4G18520
AT3G20250
AT2G18240
AT3G04070
AT2G38905
AT3G01100
AT1G53280
AT4G34300
AT2G30140
AT2G21430
AT1G62045
AT5G11090
AT2G39110
AT1G20440
AT3G57010
AT5G03070
AT3G27380
AT5G04270
AT5G58575
AT5G47610
AT3G21890
AT1G11210
AT5G03190
260379_at
AT4G34710
AT3G51860
AT5G47400
AT5G17780
AT1G62730
AT3G22370
AT1G02310
261904_at
AT5G13760
AT3G51240
AT2G36630
AT1G77250
AT1G03290
AT5G09230
AT2G32990
AT2G37585
AT1G27760
AT5G59430
AT4G11350
AT4G14960
AT1G01600
AT5G02220
AT2G03730
AT4G12020
AT1G08890
AT2G37240
AT1G11400
AT3G50060
AT2G20880
AT1G52760
AT1G53310
AT3G23430
AT5G47410
AT5G55400
AT3G56370
AT2G35000
AT5G18830
AT2G21180
AT1G62050
AT2G21780
AT3G17860
AT5G65110
AT5G20840
AT2G41730
AT4G37680
AT2G37570
AT5G67230
AT1G55265
AT3G50820
AT3G27870
AT1G80110
AT4G35320
AT5G58380
AT4G08170
AT1G76570
AT2G17500
AT3G49590
AT1G10090
AT5G55740
AT5G01300
AT3G10250
AT2G22240
AT2G21830
AT4G29000
AT3G05580
AT3G60980
AT3G10985
AT5G67480
AT4G21940
AT5G23410
AT3G29320
AT4G09500
AT2G30150
AT5G42570
AT5G38480
AT1G01360
AT1G25520
AT1G72510
AT1G65060
AT3G28430
AT3G22600
AT1G68020
AT3G19290
AT3G27020
AT3G11670
AT3G61430
AT1G06000
AT1G32640
AT5G67190
AT4G39670
AT2G41010
AT3G01170
AT5G04010
AT2G47470
AT3G10330
AT3G03550
AT3G45970
AT5G64840
AT5G03030
AT2G23340
AT3G08810
AT2G16720
AT2G45970
AT5G52430
AT4G12040
AT2G15830
AT4G30500
AT5G52550
AT5G67310
AT1G71000
AT2G45120
AT3G48360
AT5G43060
AT5G15830
AT1G60630
AT1G11350
AT5G02540
AT3G19850
AT5G12050
AT5G51190
AT5G02760
AT1G02900
AT1G19620
AT5G39080
AT1G11340
AT4G21870
AT3G14230
AT5G05440
AT1G32540
AT4G04955
AT3G19120
AT4G37870
AT4G21410
AT5G21105
AT5G22940
AT4G01770
AT2G27690
AT4G13050
AT2G38280
AT5G07580
AT5G44680
AT5G40890
AT1G80440
AT5G47780
AT5G57940
AT5G52120
AT2G30970
AT2G40940
AT1G21540
AT4G34200
AT4G27440
AT1G69160
AT3G14840
AT1G09010
AT3G57220
AT5G46450
AT2G16930
AT5G18170
245369_at
AT5G01090
AT1G28010
AT5G26360
AT4G39620
AT5G53160
AT1G15670
AT3G60320
AT3G52870
AT3G04810
AT3G19130
AT5G64570
AT1G75880
AT4G14480
AT1G69530
AT2G38310
AT2G26250
AT3G58610
AT2G25780
AT1G07570
AT5G46290
AT5G49760
AT2G18910
AT4G17460
AT2G47240
AT1G19360
AT3G15850
AT2G46225
AT4G18290
AT2G16060
AT2G45810
AT3G62780
AT1G80560
AT1G25560
AT5G44190
AT3G52500
AT4G37590
AT3G04760
AT1G34210
AT4G36810
AT2G30600
AT5G50000
AT5G57580
AT3G09770
AT3G63440
AT4G08920
AT2G34160
AT1G65930
AT3G24140
AT4G04040
AT1G75450
AT3G11540
AT3G51390
AT3G48720
AT1G12730
AT5G35790
AT1G11260
AT1G22330
AT2G35040
AT2G16640
AT3G14415
AT5G46240
AT5G05690
AT1G55360
AT3G02110
AT5G53890
AT1G26570
AT5G07870
AT5G11580
AT3G01860
AT4G18570
AT2G28200
AT1G06620
AT1G80700
AT2G22300
AT5G23880
AT2G44065
AT3G17020
AT5G07630
AT1G74040
AT2G38170
AT1G17230
AT3G05160
AT3G23550
AT2G37420
AT1G63120
AT2G40970
AT4G27730
AT5G56220
AT2G41100
AT3G49940
AT5G01050
AT5G64560
AT5G63620
AT4G26830
AT2G26670
AT1G70200
AT4G31990
AT1G21400
AT5G48950
AT1G03475
AT1G11700
AT5G37450
AT4G23570
AT3G05660
AT1G72610
AT3G14310
AT3G23730
AT3G58840
AT4G27430
AT3G20820
AT3G17390
AT3G53800
AT3G28200
AT5G33280
AT1G02280
AT3G51910
AT4G38300
AT5G36880
AT2G21080
AT2G38300
AT5G43010
AT1G27210
AT4G29140
AT2G02450
AT5G65590
AT1G72360
AT3G45640
AT5G28770
AT3G16750
AT5G18460
AT5G47220
AT3G63240
AT1G78820
AT5G03700
AT3G19930
AT1G60870
AT1G55930
AT1G09630
AT1G51805
AT2G37400
AT4G30190
AT1G07990
AT3G61150
AT5G20720
AT4G28085
AT3G15810
AT4G36250
AT1G08810
AT5G15350
AT5G18120
AT1G80640
AT4G36670
AT1G37130
AT2G30520
AT3G22104
AT3G23880
AT1G05400
AT3G16480
AT3G08940
AT2G26980
AT4G32840
AT4G31590
AT1G69850
AT4G31040
AT5G20790
AT3G12610
AT1G75730
AT1G11000
AT3G48730
AT3G28040
AT2G28020
AT5G12950
AT1G71860
AT4G29060
AT2G43910
AT3G56410
AT1G32200
AT1G02890
AT4G35750
AT1G06850
AT1G32500
AT5G53620
AT4G13330
AT4G19880
AT1G18030
AT3G13070
AT5G16720
AT2G45850
AT3G54110
AT1G33060
AT1G74470
AT2G26910
AT3G51670
AT5G09310
AT5G67560
AT2G44080
AT2G26040
AT5G13710
AT1G17200
AT1G63880
AT1G15480
AT5G25840
AT3G12020
AT2G20690
AT1G09620
AT3G46530
AT2G28080
AT3G18270
AT4G35470
AT5G46790
AT4G35760
AT1G49180
AT1G33240
AT3G23940
AT5G21090
AT1G11330
AT2G36740
AT4G16340
AT5G24165
AT5G41050
AT1G50840
AT1G28320
AT1G65620
AT5G05000
AT2G32100
AT2G16380
AT3G55710
AT1G18620
AT4G17500
AT3G07180
AT2G36360
AT1G28580
AT4G17870
AT3G04790
AT1G14340
AT4G38160
AT3G03710
AT1G03870
AT1G12430
AT4G00400
AT3G18230
AT1G08680
AT1G72820
AT2G25760
AT5G19780
AT5G03430
AT1G33810
AT1G12110
AT3G23700
AT5G17880
AT1G17350
AT5G67420
AT1G53440
AT2G23460
AT2G31820
AT3G04260
AT5G14760
AT2G43030
AT4G24140
AT3G17880
AT1G45332
AT5G20040
AT5G23860
AT1G22360
AT2G25900
AT2G17230
AT1G49500
AT3G62150
AT5G04430
AT4G21750
AT5G07000
AT3G56060
AT1G65590
AT1G34130
AT5G62360
AT4G02540
AT3G13740
AT1G74910
AT1G14210
AT5G40850
AT5G46260
AT3G01480
AT2G39400
AT3G62000
AT4G02770
AT5G16240
AT1G63940
AT1G61350
AT2G42280
AT5G50450
AT3G55130
AT3G09300
AT5G14120
AT3G27190
AT3G47760
AT3G50790
AT5G52250
AT1G63180
AT3G13120
AT5G18650
AT3G22420
AT2G18960
AT5G27830
AT5G55930
AT5G57850
AT5G23250
AT5G38150
AT1G23480
AT5G19120
AT4G17100
AT4G09730
AT5G43020
AT4G20360
AT2G25300
AT3G07140
AT5G45020
AT1G79770
AT5G63440
AT5G34930
AT2G37540
AT4G26510
AT3G28860
AT1G73490
AT5G63470
AT5G43170
AT3G14610
AT5G20250
AT5G08520
AT5G10290
AT5G17170
AT4G27900
AT4G24660
AT2G42130
AT3G56590
AT5G52830
AT5G18960
AT1G11680
AT2G31070
AT2G22800
AT4G26555
AT3G23410
AT2G19520
265143_at
AT1G66940
AT1G76080
AT1G24360
AT5G07990
AT2G26440
AT2G36310
AT3G11760
AT5G57800
AT4G26130
AT3G25740
AT4G12300
AT3G49260
AT1G22570
AT3G28920
AT1G15820
AT1G53240
AT3G06580
AT1G29660
AT3G20070
AT4G18975
AT4G04880
AT3G63270
AT3G58120
AT2G17150
AT5G52840
AT5G07860
AT5G07830
AT4G38520
AT4G28760
AT5G13510
AT4G27450
AT1G30910
AT4G25080
AT4G18480
AT1G49850
AT5G18140
AT4G21150
AT4G16390
AT4G15530
AT4G24510
AT2G25800
AT3G06060
AT1G72790
AT3G47800
AT3G26740
AT2G02040
AT5G04720
AT3G23590
AT1G73655
AT1G12500
AT1G72630
AT3G18090
AT1G25450
AT4G12060
AT1G76090
AT1G67910
AT4G01310
AT5G61600
AT2G45720
AT3G59900
AT5G37850
AT4G21990
AT4G24280
AT2G36380
AT1G16650
AT1G72300
AT4G16130
AT5G14470
AT5G08280
AT3G28910
AT1G75110
AT5G03320
AT2G41680
AT1G68590
AT3G53720
AT1G27770
AT4G26500
AT2G27680
AT5G11480
AT3G19810
AT2G27290
AT4G25260
AT5G60710
AT5G57050
AT2G27150
AT1G52340
AT1G67080
AT1G49720
AT2G13540
AT5G13680
AT1G45249
AT4G34460
AT3G63420
AT3G22942
AT2G17820
AT5G35750
AT1G27320
AT2G01830
AT5G10720
AT4G22200
AT4G16110
AT3G01500
AT1G70410
AT2G17260
AT2G43350
AT2G22430
AT1G09540
AT2G02820
AT1G14350
AT2G17800
AT5G47910
AT1G64060
AT5G60880
AT3G57270
AT5G23060
AT4G17615
AT5G47100
AT5G44200
AT2G30370
AT5G13630
AT5G01810
AT1G30270
AT2G39940
AT2G32950
AT4G23650
AT4G09570
AT2G17290
AT1G35670
AT1G04400
AT4G19230
AT5G45340
AT1G12840
AT1G66340
AT5G03280
AT2G20875
AT1G34245
AT2G26330
AT5G40280
AT3G20310
AT5G62230
AT5G07180
AT5G46330
Unknown
AT1G48270
AT1G52920
AT5G37500
AT2G26300
AT2G21660
AT1G64990
AT4G27630
AT2G46720
AT1G62400
AT3G26744
AT1G12860
AT4G32650
AT1G63700
AT4G26070
AT1G51660
AT3G21220
AT1G18350
AT1G73500
AT2G43790
AT3G18040
AT2G46070
AT2G47800
AT1G04120
AT3G06120
AT4G18350
AT3G14440
AT1G54160
AT1G77760
AT3G47450
AT5G63320
AT4G33950
AT2G29940
AT5G58140
AT3G45780
AT5G23720
AT3G56960
AT5G58670
AT3G15730
AT1G25490
AT4G28556
AT1G20090
AT3G48040
AT1G69270
AT5G48870
AT1G04110
AT3G55530
AT1G24190
AT5G60410
AT1G12480
AT3G50500
AT5G66880
AT5G35410
AT5G53210
AT4G12970
AT1G28490
AT3G11820
AT5G26000
AT5G25980
AT1G80080
AT4G03560
AT5G55630
